# Supplementary material for: Multifunctional flexible electrospun polydimethylsiloxane (ePDMS) membranes for soft robotics applications and photocatalytic conversion platforms
Source: Royal Society of Chemistry journal article supplement (doi:10.1039/d5lp00354g), 2025-12-23
Supplement: d5lp00354g1.pdf [file d5lp00354g1.pdf]

## SUPPLEMENTARY DATA

### Multifunctional, Flexible Electrospun Polydimethylsiloxane (ePDMS) Membranes for Soft Robotics Applications and Photocatalytic Conversion Platforms.

Reshma I. R.<sup>1</sup>, Gokula Nathan Kasinathan<sup>2</sup>, Akshay Tikoo<sup>4</sup>, Praveen Meduri<sup>4,5</sup>, Subha Narayan Rath<sup>2,\*</sup>, and Shourya Dutta-Gupta<sup>3,\*</sup>

<sup>1</sup>Center for Interdisciplinary Programme, Indian Institute of Technology Hyderabad, Kandi 502284, Telangana, India

<sup>2</sup>Regenerative Medicine and Stem Cell Laboratory (RMS), Department of Biomedical Engineering, Indian Institute of Technology Hyderabad, Kandi, Telangana 502284, India

<sup>3</sup>Nano-Optics And Devices Lab, Department of Materials Science and Metallurgical Engineering, Indian Institute of Technology Hyderabad, Kandi, Telangana 502284, India

<sup>4</sup>Energy Conversion And Storage Lab, Department of Chemical Engineering, Indian Institute of Technology Hyderabad, Kandi, Telangana 502284, India

<sup>5</sup>School of Chemical Engineering, Oklahoma State University, Stillwater, OK 74078, United States

\*Corresponding author: subharath@bme.iith.ac.in, shourya@msme.iith.ac.in

#### S1. Effect of heat treatment on the characteristics of ePDMS

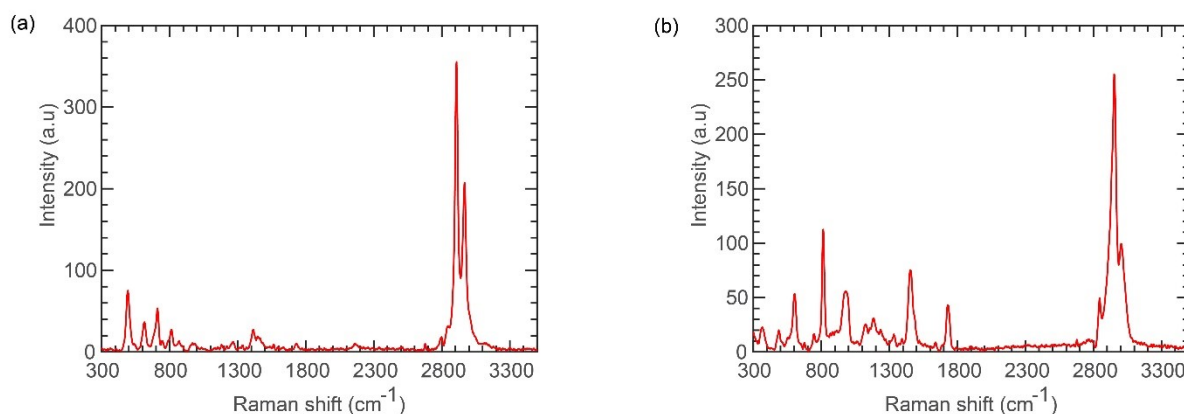

Figure S1. Raman Spectrum analysis of (a) pristine PDMS and (b) PMMA

In Figure S1, (a) corresponds to the Raman peaks obtained for pristine PDMS. As we can see, each peak corresponds to the characteristics functional peaks by which we can compare the eBHT membrane and eAHT membrane Raman peaks [Figure 1 (e) & (g)]. The 460  $\text{cm}^{-1}$  and 489  $\text{cm}^{-1}$  peaks correspond to the Si-O-Si bending vibrations and symmetric stretch, respectively. The C-Si-C symmetric stretching vibration appears at around 709  $\text{cm}^{-1}$ . And at around 865  $\text{cm}^{-1}$ , the asymmetric stretching vibration of Si-CH<sub>3</sub> occurs. The Si-CH<sub>2</sub> twisting

vibration appears at around 1300-1350  $\text{cm}^{-1}$ . The C-H asymmetric bend appears at 1411  $\text{cm}^{-1}$ , 2906  $\text{cm}^{-1}$  peak representing the C-H symmetric stretching bond.

The peak at 2842  $\text{cm}^{-1}$  corresponds to the asymmetric stretching vibration of the methyl ( $-\text{CH}_3$ ) groups in the PMMA polymer chain, while the peak at around 1730  $\text{cm}^{-1}$  corresponds to the vibrational mode of the carbonyl group ( $\text{C}=\text{O}$ ) present in the sample molecule. The peak at around 1452  $\text{cm}^{-1}$  corresponds to the bending vibration of C-H bonds in the  $\alpha$ - $\text{CH}_3$  (alpha-methyl) group and/or O- $\text{CH}_3$  (methoxy) group present in PMMA. 972  $\text{cm}^{-1}$  corresponds to the symmetric bending vibration of the methyl ( $-\text{CH}_3$ ) groups. The peak at around 810  $\text{cm}^{-1}$  corresponds to the stretching vibration of the C-O-C linkage present in the sample. The peak at around 600  $\text{cm}^{-1}$  corresponds to the stretching vibration of the C-COO and C-C-O bonds present in the sample molecule [Figure S1 (b)].

## S2. Contact angle measurement of As-ePDMS & HT-ePDMS

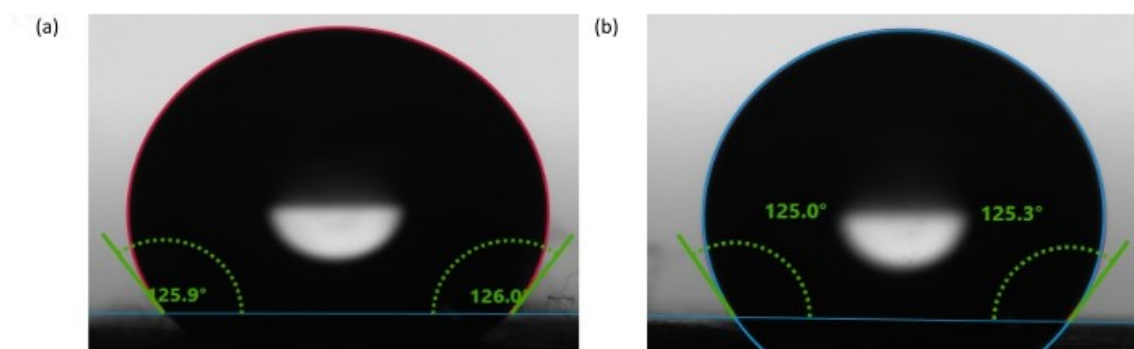

Figure S2. Water contact angle measurement of (a) AS-ePDMS and (b) HT-ePDMS

## S3. Shrinkage behavior of ePDMS:

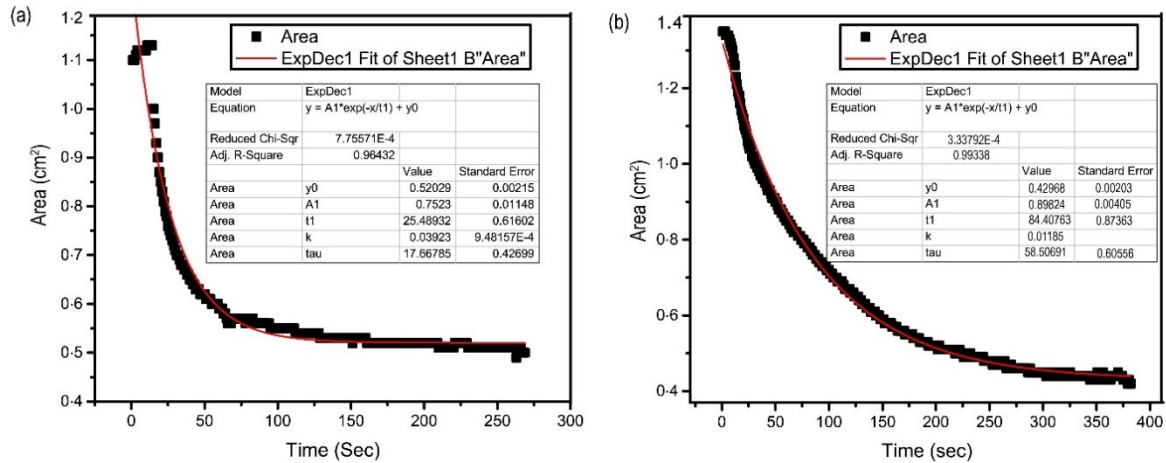

Figure S3. a) Area as a function of time of ePDMS membrane shrinkage in EtOH which is fitted with the curve with the function of Exponential Decay using the software Origin Pro 9. (b) Area as a function time of ePDMS membrane shrinkage in IPA which is fitted with the curve with the function of Exponential Decay using the software Origin Pro 9.

Figure S3 (a) & (b) corresponds to the plot of area reduction of e PDMS membrane in EtOH and IPA respectively with respect to time. As is clearly visible the membrane size we took for the shrinkage analysis is (a)1.2cm x 1.2 cm in the case of EtOH and (b)1.37 cm x 1.37 cm in the case of IPA respectively. We have plotted the respective graphs using the MATLAB software. After plotting the graph, we found that the membrane is shrinking in an exponential trend. So, to analyze the area reduction, half-life, and decay constant we have fitted the curve using the Model; Exponential Decay 1 from the software Origin Pro 9.

With the help of the equation,  $A_{rel} = C_1 \times e^{\left(-\frac{x}{t_1}\right)} + C_2$ , we were able to find out the half-life and decay constant. From Figure (a) we can say that the half-life and decay constant of the ePDMS membrane in EtOH with respect to time is 17.667 sec and 0.03923 respectively. The other parameters such as A1, Y0, and t1 with standard errors were calculated automatically and depicted in the inset of Figure S3 (a). Likewise in Figure S3( b) the half-life and decay constant of the ePDMS membrane in EtOH with respect to time are 58.50691 sec and 0.01185 respectively. The other parameters such as A1, Y0, and t1 with standard errors were calculated automatically and depicted in the inset of Figure S3 (b).

This method was continued 3 times and the half-life ( $\tau$ ) values was calculated from each plot by fitting the curve. By taking the mean and standard deviation, the half-life comparison of ePDMS in EtOH vs IPA with error bars was plotted [Figure 2 (h)].

S4. Mechanism of intermittent heat treatment for effective PMMA reduction.

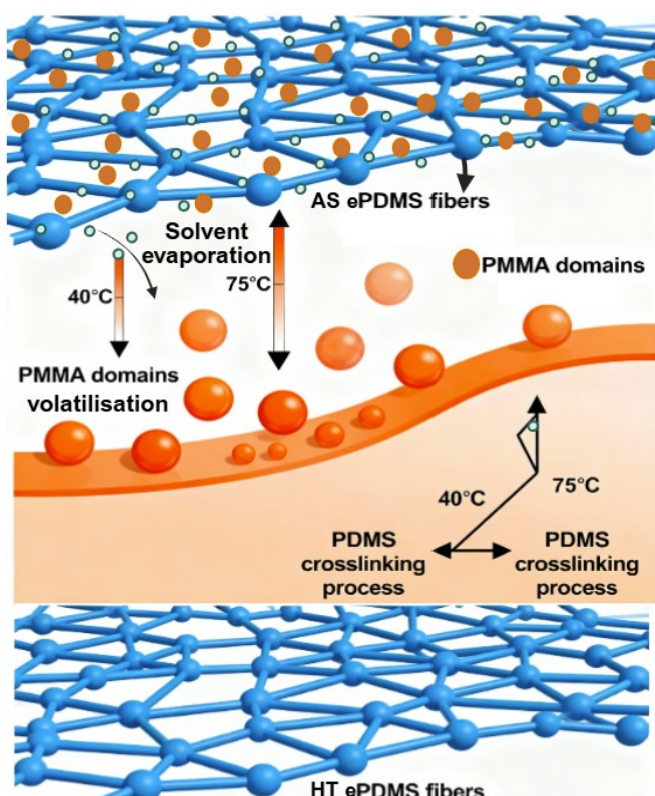

Figure S4. The mechanism of heat treatment involved in PMMA reduction from AS ePDMS membrane.

## S5. FTIR of AS ePDMS and HT ePDMS

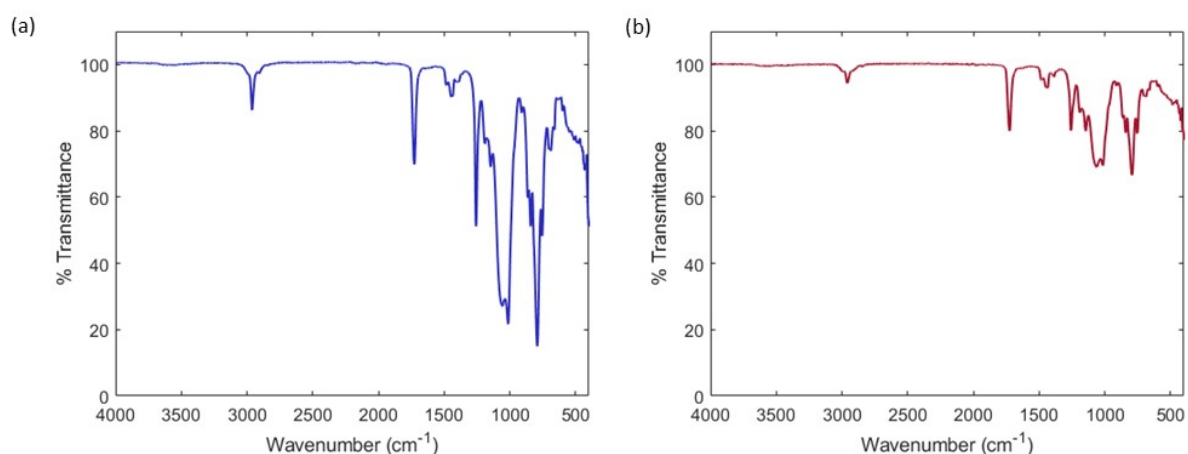

Figure S5. Fourier Transform Infrared spectroscopy (FTIR) of (a) AS electrospun PDMS/PMMA membrane (AS ePDMS) and (b) Heat-treated PDMS membrane (HT ePDMS)

#### S6.SEM Image of electrospun PDMS membrane (AS ePDMS)

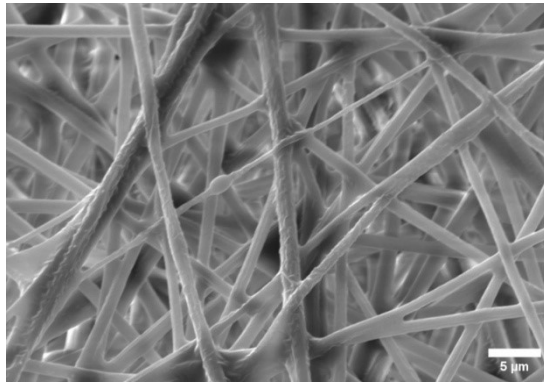

Figure S6.SEM Image of electrospun PDMS membranes before heat treatment Scale bar: 5μm

#### S7.SEM PDMS

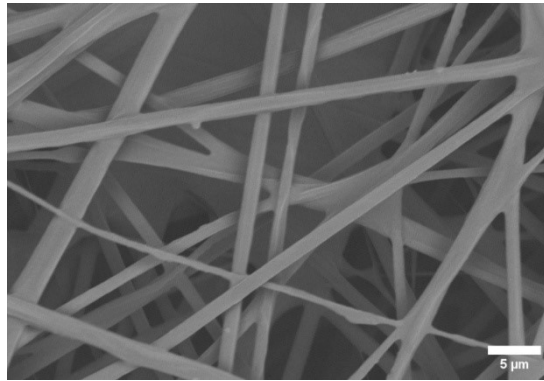

Figure S7.SEM Image of Electrospun PDMS membrane after heat treatment. Scale bar: 5μm

#### Image of heat treated electrospun membrane (HT ePDMS)

#### S8. Functional traps using ePDMS

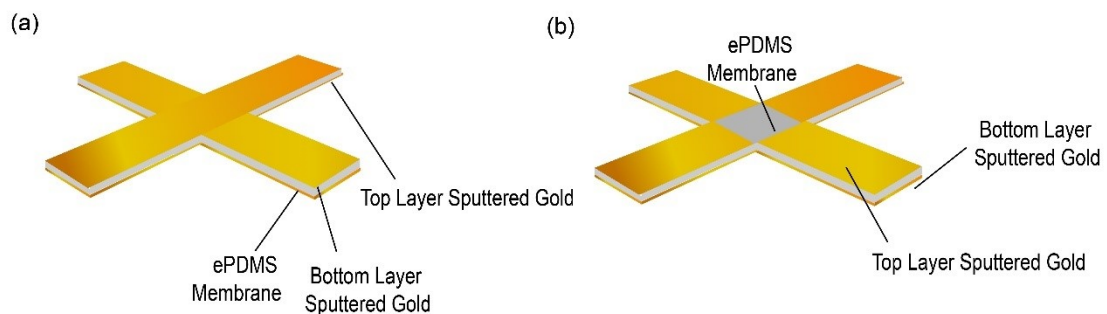

Figure S8. Representation of ePDMS membrane for functional traps; (a) depicts the bottom portion of the membrane (FLAP-F) and (b) depicts the top layer of the membrane (FLAP-T).



In Figure S8, (a) represents the cross-shaped cut ePDMS membrane, which is gold sputtered for 30sec, the gold was sputtering uniformly on all the sides with full coverage. This portion was selected as the bottom side which will be in contact with the solvent and since this is facing towards the solvent and comes in the bottom side, we named this as FLAP-F. (b) represents the cross-shaped cut ePDMS membrane, which is gold sputtered for 30sec, the gold was sputtering uniformly only on all four sides with the centre portion unsputtered. This portion was selected as the top side which will be away from the solvent and since this is facing away from the solvent and comes in the top side, we named this as FLAP-H. Briefly, (a) and (b) depicts a single ePDMS membrane cut in a cross shape with two sides top (FLAP-F) and bottom (FLAP-T) depicted separately.

#### S9. Experimental validation of Venus fly trap like ePDMS membrane

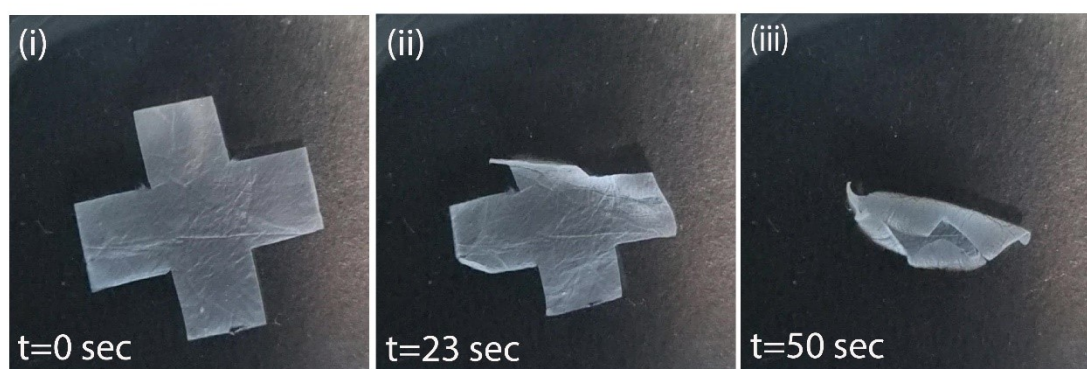

Figure S9. (i), (ii) & (iii) depict the various frames extracted from the experiment of functional traps using cross-shaped ePDMS membranes (FLAP-H & FLAP-F) at different time intervals of 0 sec, 23 sec, and 50 sec respectively.

In the above figure S9, (i) represents the cross shaped cut membrane in EtOH at time,  $t=0$  secs with FLAP-F facing the solvent side and e FLAP-H facing upwards, away from the solvent. At time,  $t=23$  sec, the membranous flaps from four sides starts folding upwards towards the centre unsputtered region of FLAP-H. and at time,  $t=50$  sec, the flaps from four sides almost completely fold towards the centre of FLAP-H resembling like a venus fly trap.

#### S10. Self folding behavior of the ePDMS membrane

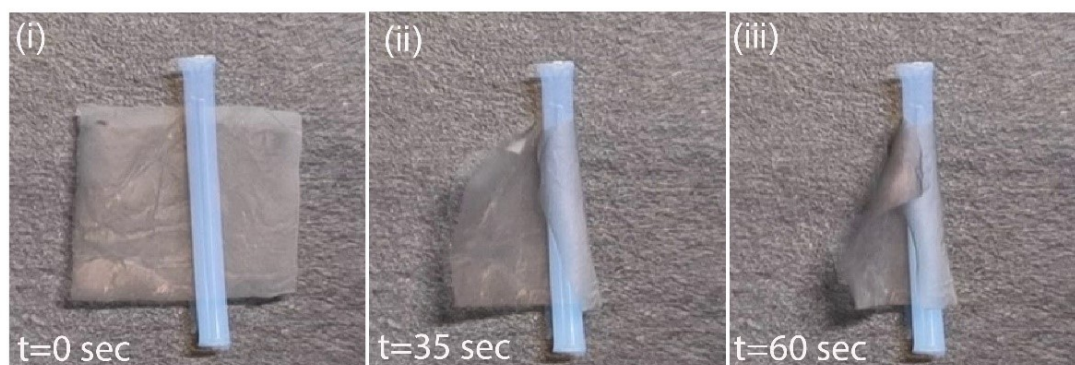

Figure S10. (i), (ii), and (iii) depict various frames extracted from the experimental video with different time rates of 0 sec, 35 sec and 60 sec respectively.

S11. SEM and EDS analysis of  $C_3N_4$  coated HT-ePDMS membranes:

(a)

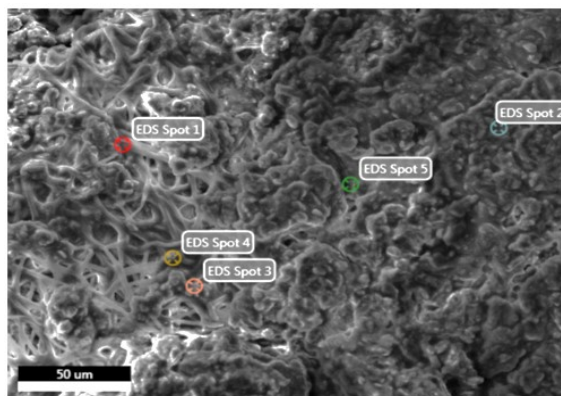

(b)

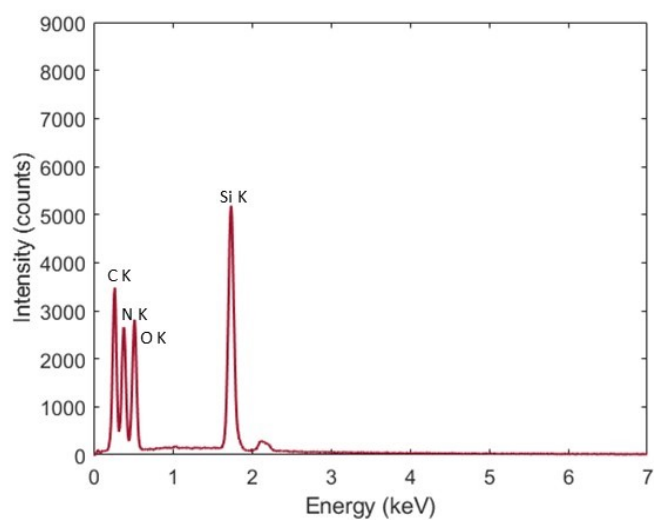

Figure S11.(a) corresponds to the Scanning electron microscopy (SEM) image of  $C_3N_4$  coated HT-ePDMS membranes, and (b) shows the EDS mapping of the elements validating the presence of  $C_3N_4$  on the PDMS membrane.
